# Supplementary material for: 13-Acetoxysarcocrassolide Induces Apoptosis on Human Gastric Carcinoma Cells Through Mitochondria-Related Apoptotic Pathways: p38/JNK Activation and PI3K/AKT Suppression
Source: PubMed Central journal article supplement (PMC4210900; doi:10.3390/md12105295), 2014-10-23
Supplement: marinedrugs-12-05295-s001.pdf [file marinedrugs-12-05295-s001.pdf]

## Supplementary Information

**Figure S1.** The cell viability of two gastric cancer cell lines, SNU-1 and NCI-N87 cells, were suppressed in a dose-dependently manner upon treatment with 13-AC. The SNU-1 and NCI-N87 cells were treated without or with the 13-AC at the final concentration between 2.5  $\mu\text{M}$  and 20  $\mu\text{M}$  for 24h. The cells were then harvested for the MTT assay as described in the Materials and Methods. Data shown here is representative of three independent experimental results.

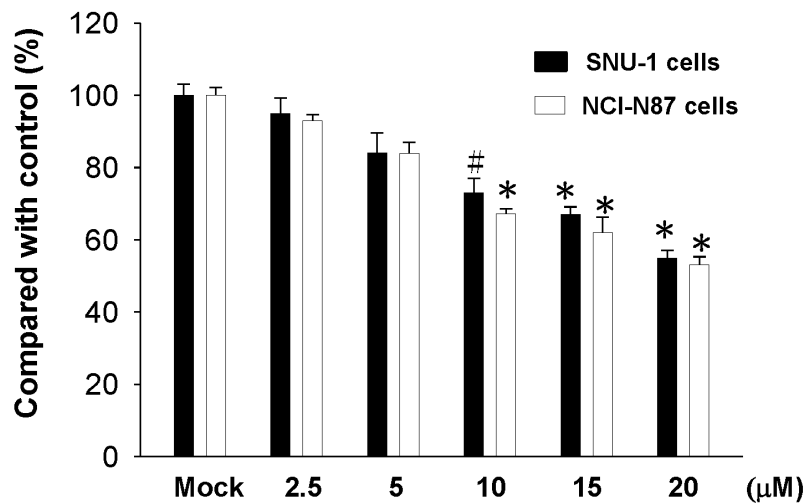

© 2014 by the authors; licensee MDPI, Basel, Switzerland. This article is an open access article distributed under the terms and conditions of the Creative Commons Attribution license (<http://creativecommons.org/licenses/by/3.0/>).
